# Supplementary material for: Chalkophomycin Biosynthesis Revealing Unique Enzyme Architecture for a Hybrid Nonribosomal Peptide Synthetase and Polyketide Synthase
Source: MDPI journal article supplement (doi:10.3390/molecules29091982), 2024-04-25
Supplement: s1 [file s1]

# Supporting Information

## Chalkophomycin Biosynthesis Revealing Unique Enzyme Architecture for a Hybrid Nonribosomal Peptide Synthetase and Polyketide Synthase

Long Yang<sup>1, 2#</sup>, Liwei Yi<sup>3, 4, #</sup>, Bang Gong<sup>3, 5</sup>, Lili Chen<sup>2</sup>, Miao Li<sup>3</sup>, Xiachengcheng Zhu<sup>3, 6, 7</sup>, Yanwen Duan<sup>3, 6, 7</sup>, and Yong Huang<sup>1, 2, 3\*</sup>

<sup>1</sup>Department of Immunology, School of Basic Medical Sciences, Anhui Medical University, Hefei 230032, China.

<sup>2</sup>Institute of Health and Medicine, Hefei Comprehensive National Science Center, Hefei, Anhui, 230093, China;

<sup>3</sup>Xiangya International Academy of Translational Medicine, Central South University, Changsha, Hunan, 410013, China.

<sup>4</sup>University of South China,

<sup>5</sup>College of Pharmacy, Hunan Vocational College of Science and Technology, Changsha, 410004, China.

<sup>6</sup>Hunan Engineering Research Center of Combinatorial Biosynthesis and Natural Product Drug Discover, Changsha, Hunan, 410011, China.

<sup>7</sup>National Engineering Research Center of Combinatorial Biosynthesis for Drug Discovery, Changsha, Hunan, 410011, China.

<sup>#</sup>Equal contribution.

\*Corresponding author: Prof. Yong Huang, Institute of Health and Medicine, Hefei Comprehensive National Science Center, Hefei, Anhui, 230093, China; [jonghuang@ihm.ac.cn](mailto:jonghuang@ihm.ac.cn)

## Index

|                                                                                                                                                                                                                      |     |
|----------------------------------------------------------------------------------------------------------------------------------------------------------------------------------------------------------------------|-----|
| <b>Table S1.</b> Plasmids and strains used in this study. ....                                                                                                                                                       | S3  |
| <b>Table S2.</b> Primers in this study. ....                                                                                                                                                                         | S4  |
| <b>Figure S1.</b> Identification of three sets of homologous proteins of GrbED from <i>S. sp.</i> CB00271, using query sequences GrbE (WP_006051176.1) (A) and GrbD (WP_006051175.1) (B). ....                       | S5  |
| <b>Figure S2.</b> Phylogenetic analysis of ChmQ with other known methyltransferases. ....                                                                                                                            | S6  |
| <b>Figure S3.</b> Alignment of the adenylation domain of ChmL predicted for activation of L-graminine with other L-graminine-specific adenylation domains from megapolibactins and gladiobactin/plantaribactin. .... | S7  |
| <b>Figure S4.</b> Phylogenetic analysis of the KS domain of ChmP with other known KSs using NaPDoS2 webtool. ....                                                                                                    | S8  |
| <b>Figure S5.</b> Sequence alignment of the R <sup>0</sup> domain of ChmL from <i>S. sp.</i> CB00271 and <i>Streptomyces sp.</i> MNU77. ....                                                                         | S9  |
| <b>Figure S6.</b> Phylogenetic analysis of <i>chm</i> gene cluster from <i>S. sp.</i> CB00271 and 116 identified <i>chm</i> -type gene clusters from the public databases. ....                                      | S10 |
| <b>References.</b> ....                                                                                                                                                                                              | S11 |

**Table S1.** Plasmids and strains used in this study.

| Strains/plasmids               | Descriptions                                                                   | Reference/<br>Source |
|--------------------------------|--------------------------------------------------------------------------------|----------------------|
| <i>E. coli</i> strains         |                                                                                |                      |
| DH5 $\alpha$                   | General cloning                                                                | Commercial<br>source |
| S17-1                          | Intergeneric conjugal transfer                                                 | Kieser T, 2000       |
| <i>Streptomyces</i> strains    |                                                                                |                      |
| CB00271                        | Producing strain of chalkophomycin                                             | This study           |
| CB00271:: $\Delta$ <i>chmO</i> | <i>ChmO</i> gene replacement mutant of CB00271                                 | This study           |
| Plasmids                       |                                                                                |                      |
| pOJ260                         | <i>E. coli</i> vector, nonreplicating in <i>Streptomyces</i> , Am <sup>R</sup> | Kieser T, 2000       |
| pXY5001                        | pOJ260-based plasmid for <i>chmO</i> inactivation, Am <sup>R</sup>             | This study           |

**Table S2.** Primers in this study.

| Primers        | Sequences (5'-3')                          | Function                                               |
|----------------|--------------------------------------------|--------------------------------------------------------|
| NRPS1.1-Up-F*  | GCGGCCGCGGATCCTCTAGAGC<br>GGCACAGGGCGAG    | Construction of<br>knockout plasmid for<br><i>chmO</i> |
| NRPS1.1-Up-R*  | GAATGTGAACACACCTCGCGCA<br>CCCC             |                                                        |
| NRPS1.1-Tsr-F* | TGCGCGAGGTGTGTTACATTC<br>GAACGGTCTCTGC     |                                                        |
| NRPS1.1-Tsr-R* | GGGCCAACTGATTTATCGGTTG<br>GCCGCGAGA        |                                                        |
| NRPS1.1-Dn-F*  | GCCAACCGATAAATCAGTTGGC<br>CCGCCG           |                                                        |
| NRPS1.1-Dn-R*  | ACGACGGCCAGTGCCAAGCTT<br>CCTGCCGACGAACTCGA |                                                        |
| pYZNRPS1.1F    | CCGCGCTTCGTCTGATCTG                        | confirmation                                           |
| pYZNRPS1.1R    | TCCAGCAGCACCCCGAC                          | of mutant $\Delta chmO$                                |

\* The red-labeled nucleic acid sequence is the overlapping region with pOJ260 and the homology arm.

**Figure S1.** Identification of three sets of homologous proteins of GrbED from *S. sp.* CB00271, using query sequences GrbE (WP\_006051176.1) (A) and GrbD (WP\_006051175.1) (B).

WP\_006051176.1 MSQSALSLPIFDSPFVGHSSERYVALIKQFAAQAQFRSAATVDLELLDDDFHRRRLRPFDFEFELKFMKFPV67  
 WP\_143203106.1 - - - MSPVSR - - - - IKSPADSPNGIVRRYAAANAPFRSATAEELLVNEDNPFRRFVRPHDLGFLDYGTGTFP60  
 WP\_073800909.1 MDTSP-SPHY - - - - SPLPGDDPNVIVKFAAANTAFRAAEWEHELTTEDNPNYRRFVRPHDDLWGLDYSGSPFM63  
 WP\_073805873.1 MVATSLIEVP - - - - EISIGDDAHSLVKEFAANTRAFRAAEWEHELTTTEQNPFRRFVRPHDDLGLWLDHSEFM62

WP\_006051176.1 REHNVSRLPALASGRTLMSIYELDLARPPLSAEP-ADWQRFDTFYSEDTRLGLAQIAPFLEAYAFLEY133  
 WP\_143203106.1 TADRAKRLSALLGHRMLRTLVDHADLPLPAGGDGHPSSSDAEAFRSLDNRVRLALQAGQVLENHLHFHW128  
 WP\_073800909.1 PADAKRLLSGLLGHRLMRLNVYDLDLHLVPARTP-AVAADQKAFYSHDNRLVSALAKPVLHERHLFSF128  
 WP\_073805873.1 REVNALKLSGLLGHRLMRLNRYADSLLYVSDPTF-AAANDGAAFFYSAPNRAIRALARPILHERHLFT129

WP\_006051176.1 LTKDVDTSLEDVGAASAR--ITRIVDDELAFWSDTEFERLMRNDYIEGLRLFIMVORWALAVSKRRRLA196  
 WP\_143203106.1 LDGERTPLRPG-GAEAVTRHVQVDLEERRAPGRGRALDVARSSGRHRDAATFTLTLTAAARPAVQSSAVG193  
 WP\_073800909.1 LAEGRTPLRPG-GAEAVATSHVIGAFEQRGAAGNKAIDAVERTVGRKEAGTFLMLQLAARFLPAMNAAV195  
 WP\_073805873.1 LDEVVRVPLETAELAAALKRHLIECYRRRSAPGDAFEAAARSTRARKESSTFLLQLFSAFLPASNAAV196

WP\_006051176.1 RAGASGFFDMLTPDERPSLHRET- - - - PDDALFERYVASAGVTRRKHAYWQFYLPTSTAKCNLLLYAL261  
 WP\_143203106.1 - RGLLGDDYCTAHAPRLRGLLDDLDRDRADREAHRYRALLTGAGLSAEQPYAYWQFLLGSSSLGGANLHLSV259  
 WP\_073800909.1 - RAALGEYDLACHTLPRPFLLDDEYRSWVDSAAATYKMLLEGGLKTTPAAAYWQLYLLTSSLARGNHLHL261  
 WP\_073805873.1 - RNALGEYDRACHPTLRLRLLDGEYQAQWVEASQSYEKMLAGAELKTTAEAYWQLYLLGTSSLARGNHLHFT262

WP\_006051176.1 ARRPDRAGFGLGAFAAAEAELVAFGLALERACF--L-OPAGRNHTDAEALKSALEQRCARLRVA325  
 WP\_143203106.1 SRDHARIGFELGAWVHHRLDEAVATAAYAEIQEAF- - - LGVDTGYFDTTPALAEGLRELVLGRLLTPLV326  
 WP\_073800909.1 SVNRENLFALFGLGAWVHHKMDLSLTRERFAADAFATC-LGVDTYFDTTPALAEGLRELVLGRLLTPLV327  
 WP\_073805873.1 SANHERLFAFLGALHKKVDEQAVRAFLSAVLADG-LGVGTGYFDTQDQKALTEADLGLQLVDELVLVAPL328

WP\_006051176.1 DNFGAAARAQYVQGIVAVGERLAAARGRWDLGELQLRWLASIREYVAFAHRIISARIDAECPGIDRETTFVE392  
 WP\_143203106.1 ERFYGDEAVSFHHGFGFEDARRLASLGDGLDEVLQVLDWADRDLREYKIKAEKLDALISESGIEVDLETTFVE393  
 WP\_073800909.1 ARYGDDEVVEGFGFGFEDAAARFALAWETDMVEQVTWADSIQEQDKAIRIDKYLDSDNNIVVDLDTTFVE394  
 WP\_073805873.1 ERFGRRVIEGYVAGFADATWLADLDWRDVAEQLTWADRIEYQDKAAKLDHHTISEGIEVDLDTTFVE395

WP\_006051176.1 PHEMCSTTHVHNDHRLVTIEEGOMLFWNVGMQMAHMKGDMVLIPDGRHLHGSTVSNECTYHQPIIF459  
 WP\_143203106.1 SHEETSTTHVHNDHRLVVVEEGQMHFWNVVGMQIMHDEGDKLLIPALRHLHGSTMVSGTCTYHQPIIF460  
 WP\_073800909.1 SNEETSTTHVHNEHRLVMVIEEGQMHFWNVVTHKIEFNOGDKVLIPVSLRHLHGSTVLSGECTYHQPIIF461  
 WP\_073805873.1 SDEETSTTHVHNEHRLVMVIEEGQMHFWNVVTHKIALNEGDKLLIPVSLRHLHGSTVLSGECTYHQPIIF462

WP\_006051176.1 DAWIEALVAELDEPATATT  
 WP\_143203106.1 DELLSQV- - - - -  
 WP\_073800909.1 DDMLNQIF- - - - -  
 WP\_073805873.1 EAMLLQLS- - - - -

[illegible]

**Figure S2.** Phylogenetic analysis of ChmQ with other known methyltransferases.

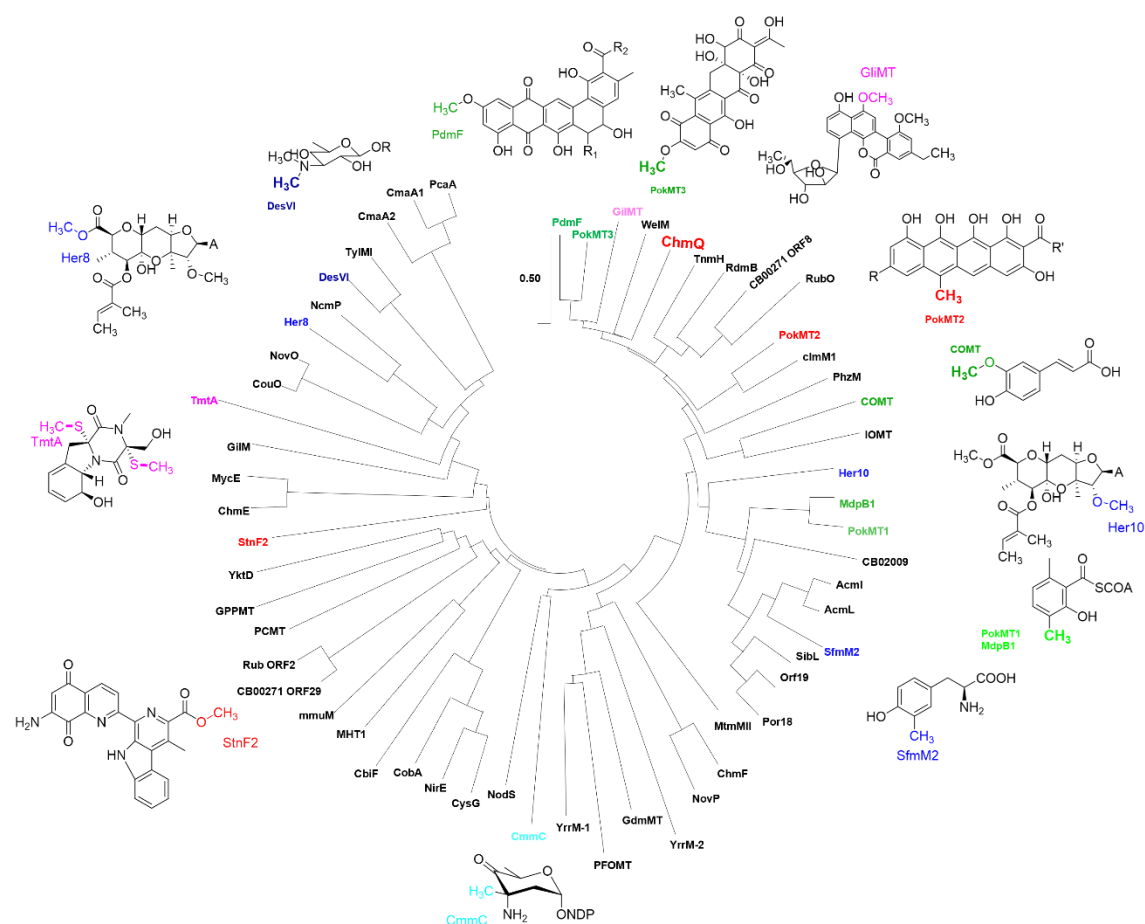





**Figure S4.** Phylogenetic analysis of the KS domain of ChmP with other known KSs using NaPDoS2 webtool.

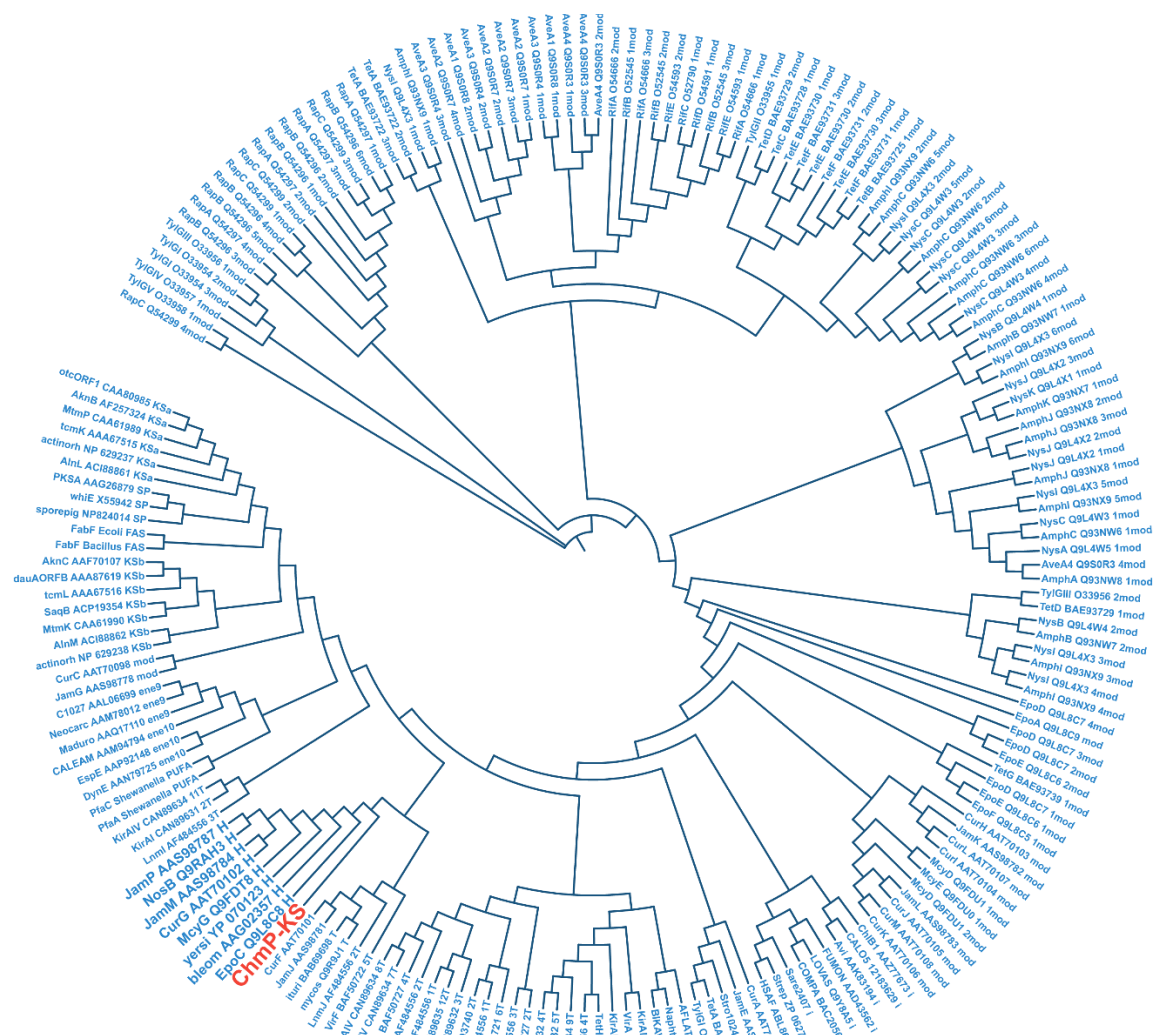



**Figure S5.** Sequence alignment of the R<sup>0</sup> domain of ChmL from *S. sp.* CB00271 and *Streptomyces sp.* MNU77.

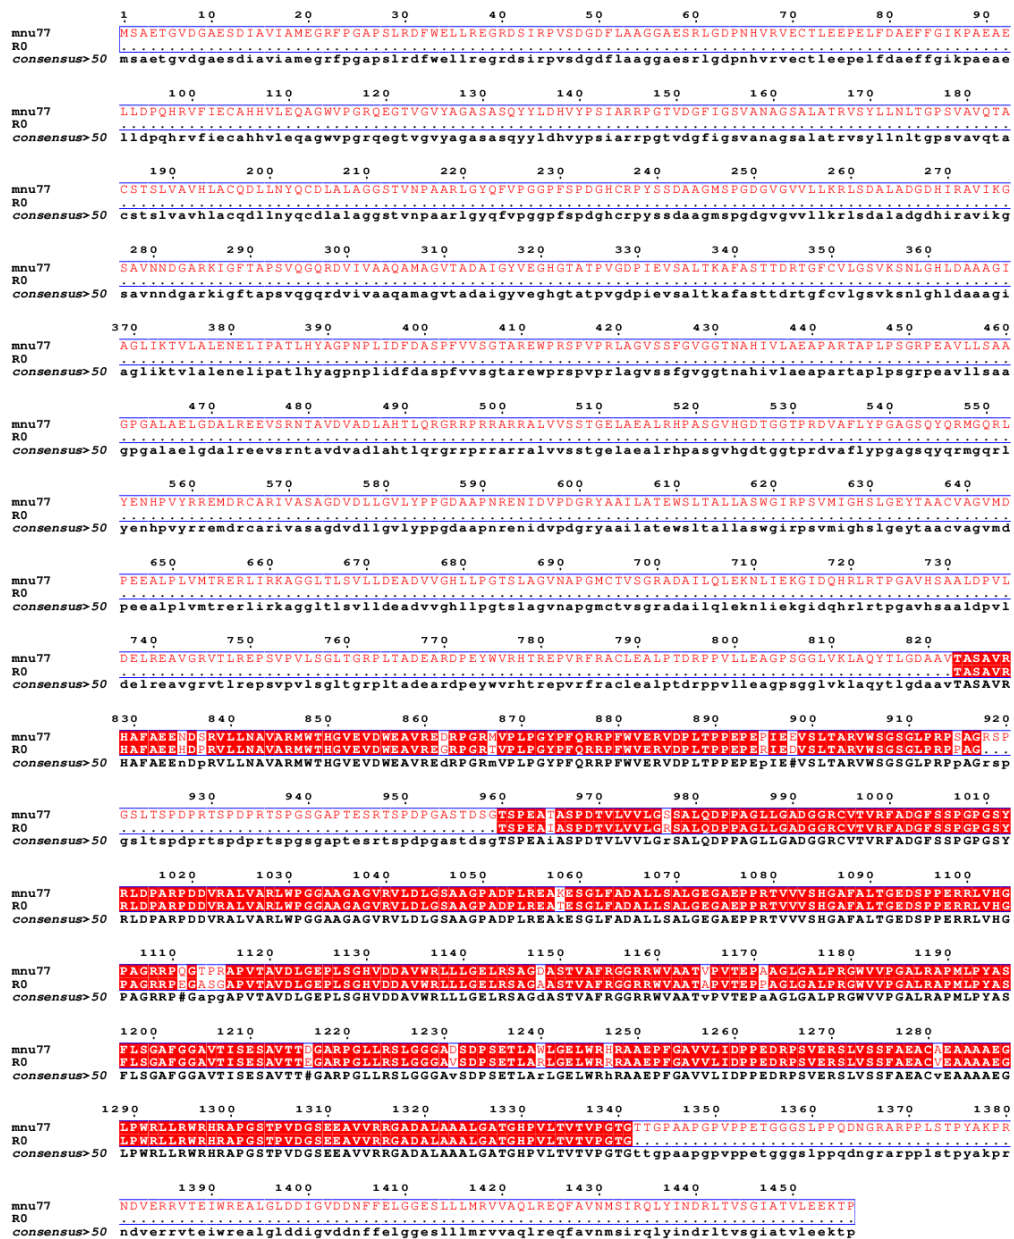

**Figure S6.** Phylogenetic analysis of *chm* gene cluster from *S. sp.* CB00271 and 116 identified *chm*-type gene clusters from the public databases.

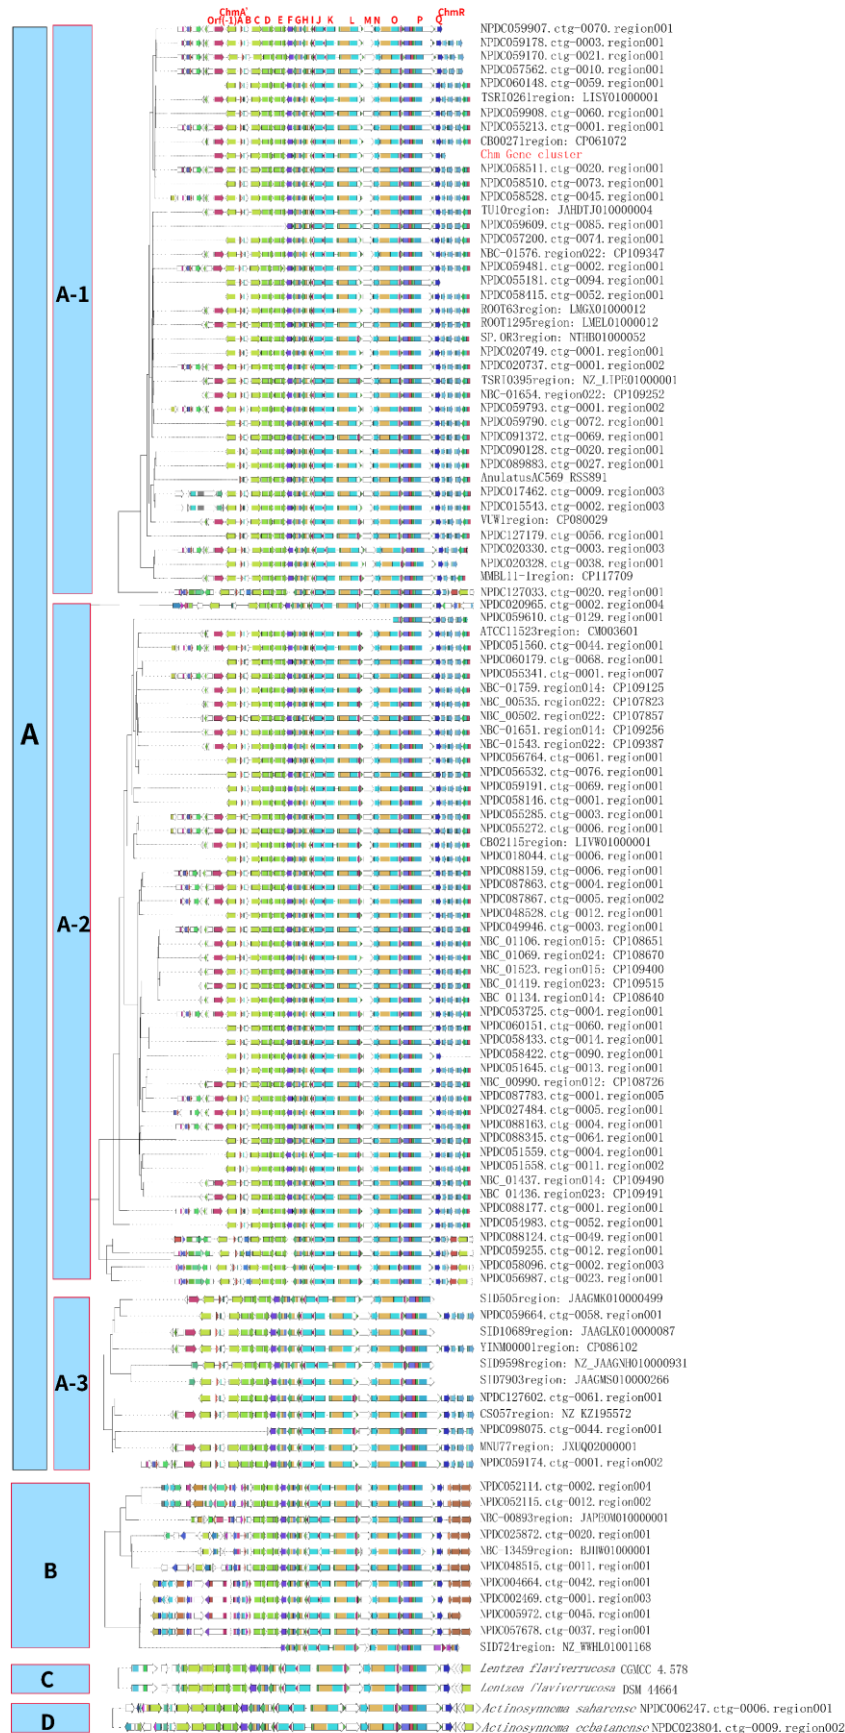

## References.

1. Kieser, T.; Bibb. M.J.; Buttner, M.J.; Chater, K.F.; Hopwood D.A. (2000). Practical *Streptomyces* genetics. *John Innes Foundation, Norwich, United Kingdom*.
